# Supplementary material for: Single-Cell Transcriptomics Uncovers Cellular Heterogeneity, Mechanisms, and Therapeutic Targets for Parkinson’s Disease
Source: Front Genet. 2022 May 4;13:686739. doi: 10.3389/fgene.2022.686739 (PMC9114673; doi:10.3389/fgene.2022.686739)
Supplement: Supplementary file 2 [file Table1.XLSX]

## Sheet: Sheet1
Gene name	log2FC	P value	Q value	PD	Control
HSPA1A	1.96017	1.14e-183	2.23e-179	3.07524	1.11507
TRIM5	1.62812	3.69e-58	7.25e-54	1.93799	0.309872
GBP4	1.48964	7.99e-70	1.57e-65	2.3843	0.894663
APOD	1.39609	7.68e-35	1.51e-30	3.62055	2.22446
GBP2	1.29732	9.64e-63	1.9e-58	2.00175	0.704428
HSPH1	1.26669	7.99e-117	1.57e-112	1.94298	0.676293
HSP90AA1	1.20574	2.24e-151	4.4e-147	3.83771	2.63197
ANGPT2	1.20345	9.51e-42	1.87e-37	4.13398	2.93053
HSPA1B	1.11248	7.16e-92	1.41e-87	1.41565	0.303167
SLC38A2	1.03053	4.76e-104	9.36e-100	2.88818	1.85764
GBP1	1.00215	1.76e-42	3.47e-38	1.44291	0.440752
IRF1	0.952963	7.29e-51	1.43e-46	1.30659	0.353632
PLCG2	0.902713	2.51e-62	4.93e-58	2.94118	2.03847
HSPB1	0.901109	2.34e-58	4.61e-54	2.62224	1.72113
DNAJA1	0.876502	5.55e-78	1.09e-73	1.85862	0.982114
AKR1C1	0.868437	5.86e-70	1.15e-65	1.1212	0.252767
ANKRD37	0.822412	2.35e-29	4.63e-25	1.81943	0.997019
HSPA8	0.821518	4.28e-62	8.42e-58	2.02231	1.2008
HIGD1B	0.815489	8.43e-40	1.66e-35	2.12978	1.31429
HSP90AB1	0.799848	1.71e-78	3.37e-74	3.03406	2.23421
IVNS1ABP	0.782203	1.87e-26	3.68e-22	1.52318	0.740977
SLC6A12	0.772845	1.45e-22	2.85e-18	2.73982	1.96698
ISYNA1	0.77087	2.87e-33	5.65e-29	1.56136	0.790492
ADAMTS9-AS2	0.76126	1.05e-38	2.06e-34	3.30431	2.54305
ADAMTS9	0.742439	1.47e-13	2.88e-09	4.26194	3.5195
MT2A	0.740304	2.34e-42	4.59e-38	4.70595	3.96565
PRELP	0.72858	5.24e-23	1.03e-18	2.20428	1.4757
RASGRP3	0.717202	6.51e-29	1.28e-24	1.33418	0.616982
RAPGEF5	0.713518	2.45e-30	4.81e-26	2.69193	1.97842
PLA1A	0.707438	2.41e-30	4.73e-26	1.32682	0.619383
DNAJB1	0.703965	6.26e-43	1.23e-38	1.20031	0.496349
IFI16	0.700122	4.95e-39	9.73e-35	2.12515	1.42502
RHOJ	0.697843	5.75e-39	1.13e-34	2.56651	1.86867
NEAT1	0.69408	5.09e-62	1e-57	5.73638	5.0423
ATP1B3	0.688344	4.03e-39	7.92e-35	2.22061	1.53227
BCL6	0.685016	4.34e-32	8.54e-28	1.52597	0.840958
P4HA1	0.683518	1.48e-35	2.92e-31	1.83126	1.14775
RIPOR3	0.678998	2.62e-24	5.16e-20	1.87153	1.19253
RNF152	0.671302	3.2e-15	6.3e-11	2.85997	2.18866
FAM13A	0.667858	1.31e-20	2.57e-16	2.05017	1.38231
SAT1	0.661653	5.12e-21	1.01e-16	2.96001	2.29836
C11orf96	0.652944	3.09e-09	6.08e-05	2.39534	1.7424
STAU2	0.650374	6.57e-30	1.29e-25	2.3781	1.72772
PCAT19	0.647346	3.05e-31	6e-27	1.61393	0.966588
PDE1C	0.64429	3.1e-14	6.09e-10	2.4253	1.78101
FKBP4	0.643634	2.27e-50	4.47e-46	1.12946	0.485823
CHORDC1	0.632358	8.25e-49	1.62e-44	1.10867	0.476309
PTGES3	0.621246	2.93e-44	5.77e-40	1.86424	1.24299
TSC22D1	0.608936	7.94e-27	1.56e-22	3.92106	3.31212
VAMP5	0.608927	5.38e-33	1.06e-28	1.89554	1.28662
CACYBP	0.604375	7.68e-45	1.51e-40	0.952309	0.347934
HIF1A	0.603625	3.99e-33	7.84e-29	1.95351	1.34988
GLS	0.602051	1.05e-34	2.07e-30	2.12847	1.52642
SEMA5A	0.59635	5.84e-14	1.15e-09	2.02293	1.42658
ELL2	0.586119	3.24e-16	6.38e-12	2.62621	2.04009
